# Supplementary material for: Exploiting Interdata Relationships in Prostate Cancer Proteomes: Clinical Significance of HO-1 Interactors
Source: MDPI journal article supplement (doi:10.3390/antiox11020290), 2022-01-31
Supplement: s1 [file s1]

## Supplementary information

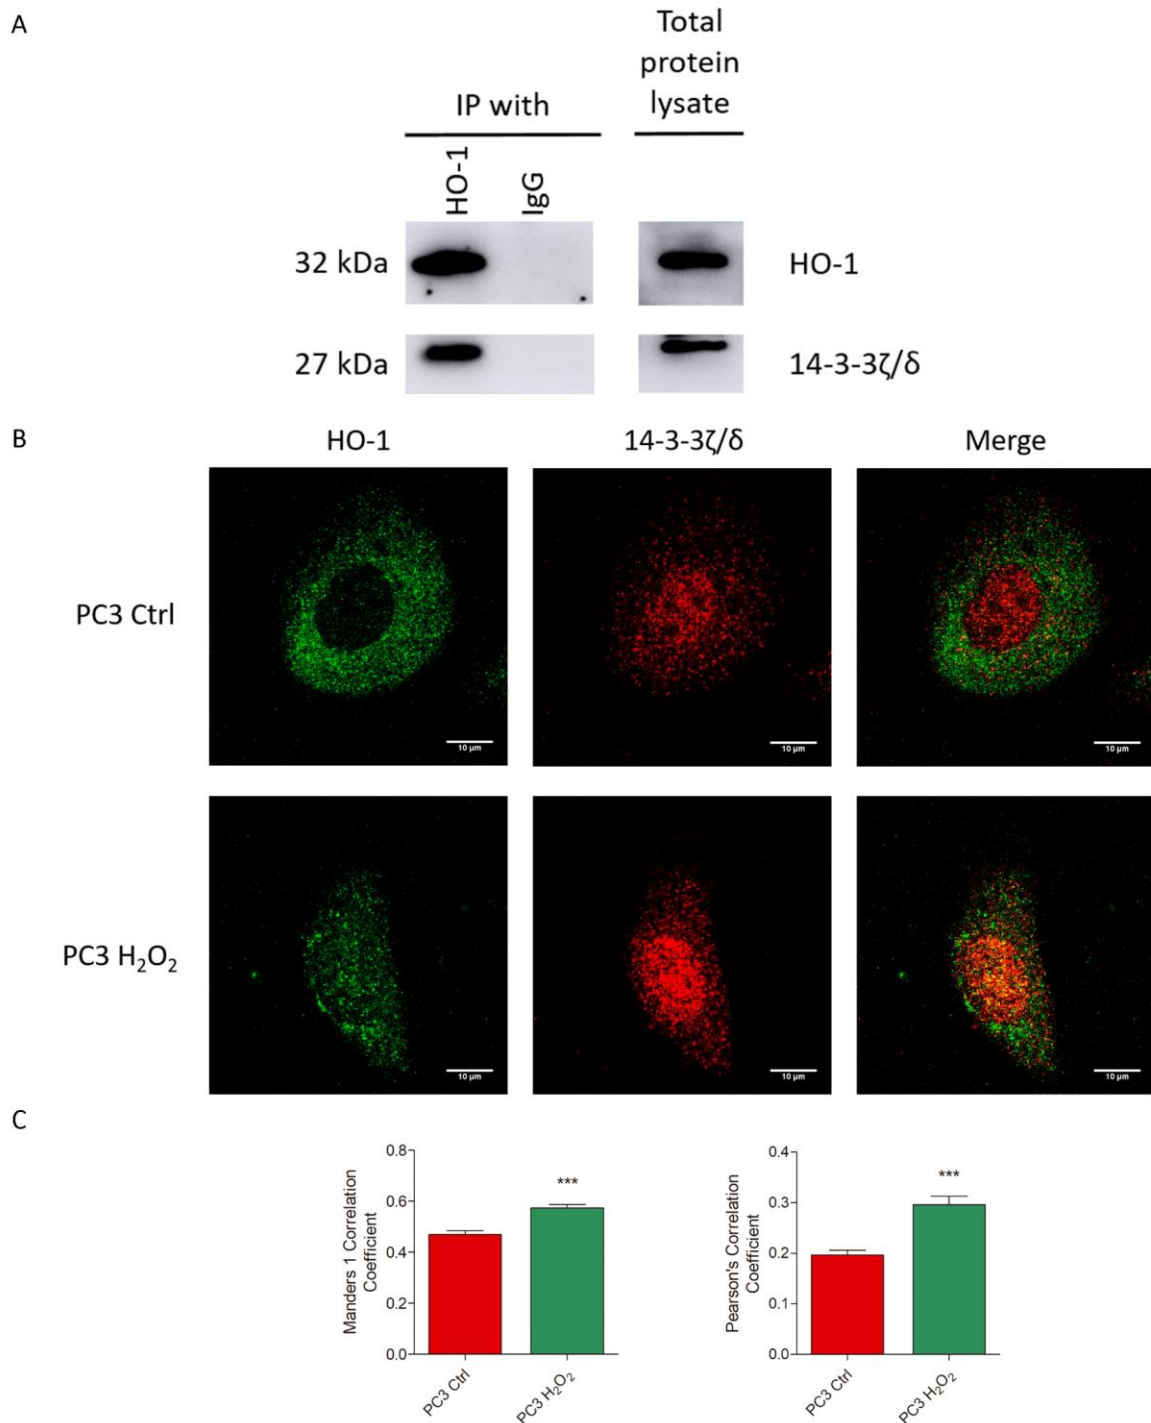

**Figure S1. Validation of the interaction between 14-3-3ζ/δ and HO-1 by co-immunoprecipitation and fluorescence microscopy.** A) PC3 cells were treated with H<sub>2</sub>O<sub>2</sub> (200 μM, 30 min). After 24 h of treatment, cells were lysed and the lysates were subjected to immunoprecipitation (IP) with monoclonal rabbit anti-human HO-1 or anti-human IgG antibodies (control) using agarose beads. Immunoprecipitates were analyzed by Western Blot using monoclonal mouse anti-human HO-1 or rabbit anti-human 14-3-3ζ/δ antibodies. B) PC3 cells were treated or not with H<sub>2</sub>O<sub>2</sub> (200 μM, 30 min). 24 h after treatment, immunofluorescence staining was performed to observe the cellular localization of endogenous HO-1 and 14-3-3ζ/δ. Scale bars denote 10 μm. More than 20 cells were analyzed for the IF assay for each condition. A representative image from each group is shown. One representative image from at least three independent experiments is shown. C) Manders (left panel) and Pearson (right panel) co-localization coefficients for PC3 cells treated with H<sub>2</sub>O<sub>2</sub> (200 μM, 1 h) or control. Manders 1 = Fraction of HO-1 overlapping 14-3-3ζ/δ. Bars represent mean ± s.e.m from 3 biologic independent experiments. \**p* < 0.05; \*\**p* < 0.01; \*\*\**p* < 0.001.

### Ross-Adams patients' characteristics at baseline

|                                                | #   | Freq. (%) |
|------------------------------------------------|-----|-----------|
| <b>Diagnosis Age (41-73, mean: 60.1 years)</b> |     |           |
| < 50                                           | 6   | 2.91      |
| 50-59                                          | 37  | 17.96     |
| 60-69                                          | 61  | 29.61     |
| 70-79                                          | 7   | 3.40      |
| >79                                            | 0   | 0.00      |
| N.A.                                           | 105 | 50.97     |
| <b>Clinical Stage</b>                          |     |           |
| T1                                             | 102 | 49.51     |
| T2                                             | 72  | 34.95     |
| T3                                             | 25  | 12.14     |
| N.A.                                           | 7   | 3.40      |
| <b>Gleason Score</b>                           |     |           |
| 5                                              | 2   | 0.97      |
| 6                                              | 35  | 16.99     |
| 7 (3+4)                                        | 102 | 49.51     |
| 7 (4+3)                                        | 40  | 19.42     |
| 8                                              | 13  | 6.31      |
| 9                                              | 10  | 4.85      |
| 10                                             | 1   | 0.49      |
| N.A.                                           | 3   | 1.46      |
| <b>PSA at Diagnosis</b>                        |     |           |
| < 4                                            | 11  | 5.34      |
| 4 - 10                                         | 134 | 65.05     |
| > 10                                           | 60  | 29.13     |
| N.A.                                           | 1   | 0.49      |

**Table S1. Ross-Adams patients' characteristics at baseline (start of the follow-up survival analyses).** Table contains age, clinical stage, Gleason score and PSA at diagnosis data.

| Protein Name                                                                                | Gene Symbol | Theoretical molecular mass (Da) | PSM | Unique peptides | Score | Coverage |
|---------------------------------------------------------------------------------------------|-------------|---------------------------------|-----|-----------------|-------|----------|
| High mobility group protein HMG-I/HMG-Y isoform a                                           | AHCTF1      | 11.669                          | 2   | 1               | 128   | 28%      |
| Alpha-2-HS-glycoprotein                                                                     | AHSG        | 40.098                          | 1   | 1               | 47    | 1%       |
| s100 calcium-binding protein A6                                                             | CACYBP      | 10.23                           | 1   | 1               | 49    | 41%      |
| Chromobox homolog 1                                                                         | CBX1        | 21.519                          | 4   | 2               | 155   | 11%      |
| Chromobox homolog 3                                                                         | CBX3        | 20.997                          | 4   | 2               | 174   | 15%      |
| Damage-specific DNA binding protein 1, 127kDa                                               | DDB1        | 128.086                         | 3   | 1               | 58    | 1%       |
| Eukaryotic translation elongation factor 2                                                  | EEF2        | 96.246                          | 1   | 1               | 55    | 2%       |
| Filamin B                                                                                   | FLNB        | 280.185                         | 1   | 1               | 61    | 1%       |
| FtsJ3 protein                                                                               | FTSJ3       | 84.015                          | 1   | 1               | 53    | 2%       |
| Gelsolin                                                                                    | GSN         | 31.052                          | 4   | 3               | 203   | 22%      |
| High mobility group AT-hook 1                                                               | HMGA1       | 34.635                          | 3   | 2               | 51    | 28%      |
| Heme oxygenase 1                                                                            | HMOX1       | 32.798                          | 35  | 5               | 167   | 25%      |
| Heterogeneous nuclear ribonucleoprotein A2/B1                                               | HNRNPA2B1   | 36.041                          | 7   | 4               | 197   | 20%      |
| Heterogeneous nuclear ribonucleoprotein D                                                   | HNRNPD      | 36.086                          | 1   | 1               | 71    | 4%       |
| Heterogeneous nuclear ribonucleoprotein U-like 2                                            | HNRNPUL2    | 85.622                          | 1   | 1               | 56    | 4%       |
| Heterogeneous nuclear ribonucleoprotein D-like                                              | HNRPDL      | 46.58                           | 1   | 1               | 54    | 1%       |
| Heat shock 27kDa protein                                                                    | HSPB1       | 22.427                          | 5   | 3               | 178   | 32%      |
| KH-type splicing regulatory protein                                                         | KHSRP       | 10.362                          | 1   | 1               | 66    | 20%      |
| Kinesin-like protein KIF23                                                                  | KIF23       | 98.842                          | 2   | 1               | 59    | 1%       |
| Matrin 3                                                                                    | MATR3       | 95.078                          | 4   | 2               | 125   | 5%       |
| Nucleosome assembly protein 1-like 1                                                        | NAP1L1      | 45.631                          | 2   | 1               | 73    | 4%       |
| Nucleophosmin 1                                                                             | NPM1        | 31.09                           | 4   | 2               | 165   | 12%      |
| Plectin 1                                                                                   | PLEC        | 516.4                           | 59  | 40              | 2406  | 11%      |
| Peroxiredoxin 6                                                                             | PRDX6       | 25011                           | 2   | 1               | 59    | 9%       |
| Purine-rich element binding protein A                                                       | PURA        | 35,003                          | 1   | 1               | 66    | 8%       |
| Retinoic acid induced 14                                                                    | RAI14       | 110.617                         | 2   | 1               | 60    | 1%       |
| Regulator of chromosome condensation                                                        | RCC1        | 44,485                          | 2   | 1               | 79    | 3%       |
| Replication protein A 70 kDa DNA-binding subunit                                            | RPA1        | 68.723                          | 1   | 1               | 66    | 9%       |
| Ribosomal protein SA pseudogene 9                                                           | RPSA        | 32.947                          | 1   | 1               | 68    | 9%       |
| Signal-induced proliferation-associated 1-like protein 1                                    | SIPA1L1     | 201.102                         | 1   | 1               | 47    | 1%       |
| Sequestosome 1                                                                              | SQSTM1      | 48.37                           | 1   | 1               | 54    | 4%       |
| Splicing factor, arginine/serine-rich 3                                                     | SRSF3       | 19.546                          | 1   | 1               | 53    | 1%       |
| Testis derived transcript                                                                   | TES         | 49.789                          | 2   | 1               | 52    | 3%       |
| Thyroid hormone receptor associated protein 3                                               | THRAP3      | 108.686                         | 1   | 1               | 53    | 1%       |
| Tropomodulin 3                                                                              | TMOD3       | 39.727                          | 4   | 2               | 177   | 9%       |
| DNA topoisomerase 1                                                                         | TOP1        | 66,890                          | 2   | 2               | 115   | 5%       |
| Tripartite motif-containing 28                                                              | TRIM28      | 80.621                          | 11  | 7               | 463   | 17%      |
| Tyrosine 3-monooxygenase/tryptophan 5-monooxygenase activation protein, beta polypeptide    | YWHAB       | 28.179                          | 1   | 1               | 78    | 11%      |
| Tyrosine 3-monooxygenase/tryptophan 5-monooxygenase activation protein, epsilon polypeptide | YWHAE       | 29.326                          | 1   | 1               | 98    | 11%      |
| Tyrosine 3-monooxygenase/tryptophan 5-monooxygenase activation protein, zeta polypeptide    | YWHAZ       | 27.899                          | 3   | 2               | 183   | 17%      |
| Zinc finger CCCH-type, antiviral 1                                                          | ZC3HAV1     | 103.135                         | 3   | 2               | 219   | 7%       |

**Table S2. Differential proteins identified by mass spectrometry in GST-HO-1 vs. GST.** The table includes the protein name, the gene name, the theoretical molecular mass (kDa), the number of PSMs, the number of unique peptides, the score and the coverage. PSMs = Peptide Spectrum Matches.
